# Supplementary material for: A Systematic Investigation on the Influence of Intumescent Flame Retardants on the Properties of Ethylene Vinyl Acetate (EVA)/Liner Low Density Polyethylene (LLDPE) Blends
Source: MDPI journal article supplement (doi:10.3390/molecules28031023), 2023-01-19
Supplement: s1 [file s1]

# A systematic investigation on the influence of intumescent flame retardants on the properties of ethylene vinyl acetate (EVA)/liner low density polyethylene (LLDPE) blends

Eid Alosime<sup>1\*</sup> and Ahmed A. Basfar<sup>2</sup>

<sup>1</sup> King Abdulaziz City for Science and Technology, P.O. Box 6086, Riyadh 11442, Saudi Arabia.

<sup>2</sup> King Saud University, College of Engineering, Mechanical Engineering Department, P.O. Box 145111, Riyadh 4545, Saudi Arabia.

Corresponding to: alosimi@kacst.edu.sa

**Table S1.** EVA/EBM/CLNA-8400/120phr MH flame retardant formulations as a function of Tafmer 805 content.

| Content/Property                                                   | AP-647   | AP-654   | AP-655   | AP-656   | AP-657   |
|--------------------------------------------------------------------|----------|----------|----------|----------|----------|
| EVA                                                                | 85       | 80       | 75       | 70       | 65       |
| LLDPE 118W                                                         | -        | -        | -        | -        | -        |
| Tafmer 805                                                         | -        | 5        | 10       | 15       | 20       |
| CLNA-8400                                                          | 6        | 6        | 6        | 6        | 6        |
| EBM                                                                | 9        | 9        | 9        | 9        | 9        |
| MH                                                                 | 120      | 120      | 120      | 120      | 120      |
| Carbon black 550                                                   | 6.0      | 6.0      | 6.0      | 6.0      | 6.0      |
| Naugard Q                                                          | 1.5      | 1.5      | 1.5      | 1.5      | 1.5      |
| Tensile strength (MPa) at RT                                       | 13.0±0.2 | 13.3±0.2 | 13.3±0.3 | 13.9±0.4 | 14.1±0.4 |
| Elongation at break (%) at RT                                      | 208±13   | 229±12   | 220±16   | 222±11   | 228±12   |
| Tensile strength (MPa) after thermal aging at 100°C                | 12.5±0.2 | 13.1±0.3 | 13.3±0.1 | 13.2±0.1 | 13.3±0.2 |
| Retention of tensile strength (%) after thermal aging at 100°C     | 96.1     | 98.5     | 100      | 95.0     | 94.3     |
| Elongation at break (%) after thermal aging at 100 °C              | 201±12   | 213±8    | 219±17   | 229±9    | 221±4    |
| Retention of elongation at break (%) after thermal aging at 100 °C | 96.6     | 93       | 99.5     | 103.2    | 96.9     |
| LOI (%)                                                            | 30.0     | 30.5     | 30.0     | 30.0     | 30.0     |

**Table S2.** EVA/120 phr MH formulations as a function of EBM content.

| Content/Property                                                   | AP-586   | AP-638   | AP-639   | AP-640   | AP-641   |
|--------------------------------------------------------------------|----------|----------|----------|----------|----------|
| EVA                                                                | 85       | 91       | 88       | 85       | 80       |
| LLDPE 118W                                                         | 15       | -        | -        | -        | -        |
| EXACT 8201                                                         | -        | -        | -        | -        | -        |
| CLNA-8400                                                          | -        | -        | -        | -        | -        |
| EBM                                                                | -        | 9        | 12       | 15       | 20       |
| MH                                                                 | 120      | 120      | 120      | 120      | 120      |
| Carbon black 550                                                   | 6.0      | 6.0      | 6.0      | 6.0      | 6.0      |
| Naugard Q                                                          | 1.5      | 1.5      | 1.5      | 1.5      | 1.5      |
| Tensile strength (MPa) at RT                                       | 11.3±0.3 | 14.2±0.4 | 14.3±0.1 | 14.6±0.2 | 14.5±0.1 |
| Elongation at break (%) at RT                                      | 177±10   | 225±8    | 214±13   | 216±15   | 194±15   |
| Tensile strength (MPa) after thermal aging at 100°C                | 12.6±0.2 | 12.7±0.3 | 13.5±0.2 | 13.6±0.3 | 13.3±0.3 |
| Retention of tensile strength (%) after thermal aging at 100°C     | 111.5    | 89.4     | 94.4     | 93.2     | 91.7     |
| Elongation at break (%) after thermal aging at 100 °C              | 179±8    | 219±5    | 219±6    | 212±6    | 192±8    |
| Retention of elongation at break (%) after thermal aging at 100 °C | 101.1    | 97.3     | 102.3    | 98.1     | 98.9     |
| LOI (%)                                                            | 38.0     | 31.5     | 31.0     | 30.0     | 31.0     |

**Figure S1.** The morphology of the prepared composites was studied by scanning electron microscopy (SEM).

Figure S1 displays SEM micrographs of the EVA/LLDPE 118W and selected corresponding composites containing 120 phr flame retardants (MH+RP).

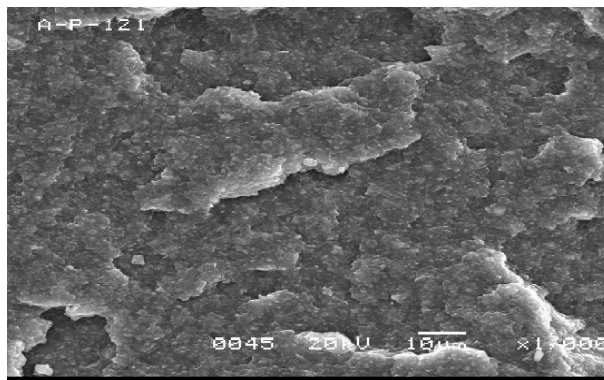

LDPE:EVA = 20:80  
with 120 phr magnesium hydroxide  
(MH) (AP-587)

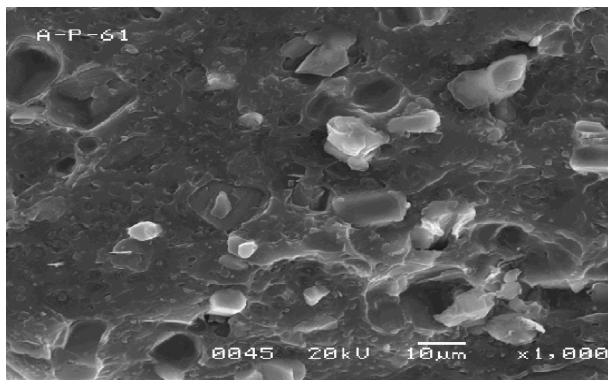

LDPE:EVA = 20:80  
with 120 phr magnesium  
hydroxide + red phosphorus (AP-  
663)

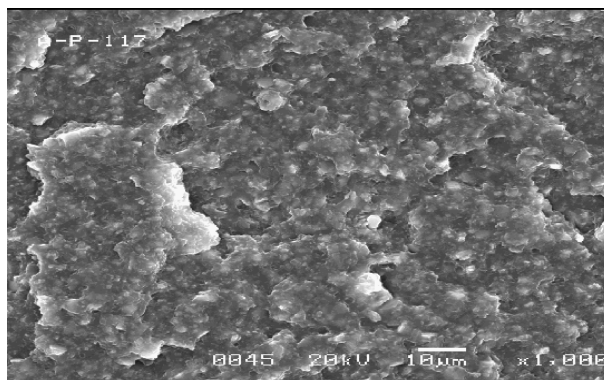

LDPE:EVA = 20:80  
with 120 phr magnesium hydroxide +  
red phosphorus (AP-665)

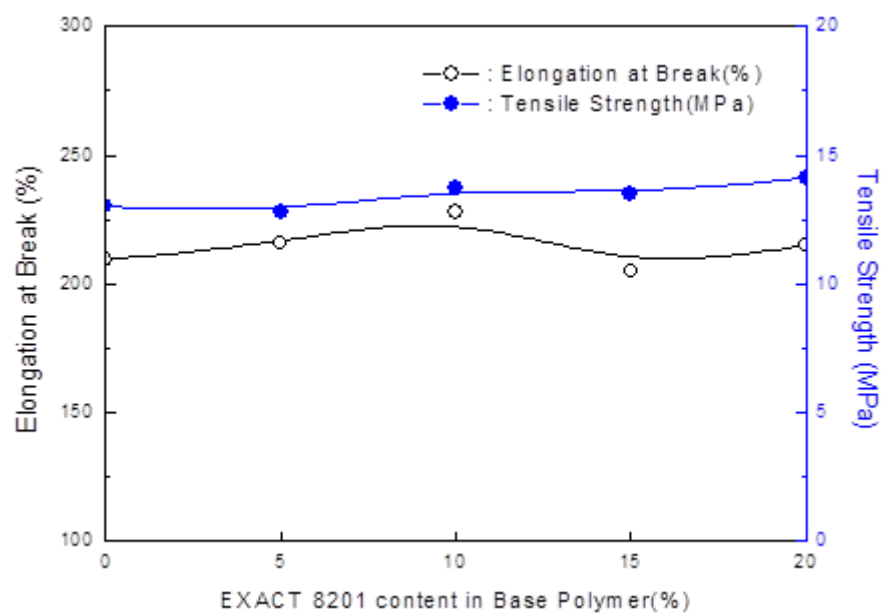

**Figure S2.** Mechanical properties of EVA/CLNA-8400/EBM/120phr flame retardants (MH) formulations as a function of EXACT 8201 content.
